# Supplementary material for: Gene Delivery of Manf to Beta-Cells of the Pancreatic Islets Protects NOD Mice from Type 1 Diabetes Development
Source: MDPI journal article supplement (doi:10.3390/biom12101493), 2022-10-16
Supplement: s1 [file s1]

## Supplementary Material

# Gene Delivery of Manf to Beta-Cells of the Pancreatic Islets Protects NOD Mice from Type 1 Diabetes Development

Kailash Singh <sup>1,2,\*</sup>, Orian Bricard <sup>1</sup>, Jeason Haughton <sup>3,4</sup>, Mikaela Björkqvist <sup>2</sup>, Moa Thorstensson <sup>2</sup>, Zhengkang Luo <sup>2</sup>, Loriana Mascali <sup>3,4,5</sup>, Emanuela Pasciuto <sup>3,4,5</sup>, Chantal Mathieu <sup>6</sup>, James Dooley <sup>1,†,\*</sup> and Adrian Liston <sup>1,3,4,†,\*</sup>

<sup>1</sup> Immunology Programme, The Babraham Institute, Cambridge CB22 3AT, UK

<sup>2</sup> Medical Cell Biology, Uppsala University, Uppsala 751 05, Sweden

<sup>3</sup> VIB Center for Brain and Disease Research, KU Leuven-University of Leuven, Leuven 3000, Belgium

<sup>4</sup> Department of Microbiology, Immunology and Transplantation, KU Leuven—University of Leuven, Leuven 3000, Belgium

<sup>5</sup> Department of Neurosciences, KU Leuven—University of Leuven, Leuven 3000, Belgium

<sup>6</sup> Department of Chronic Diseases and Metabolism, KU Leuven—University of Leuven, Leuven 3000, Belgium

† These authors contributed equally to this work.

\* Correspondence: kailash.singh@mcb.uu.se (K.S.); james.dooley@babraham.ac.uk (J.D.); al989@cam.ac.uk (A.L.)

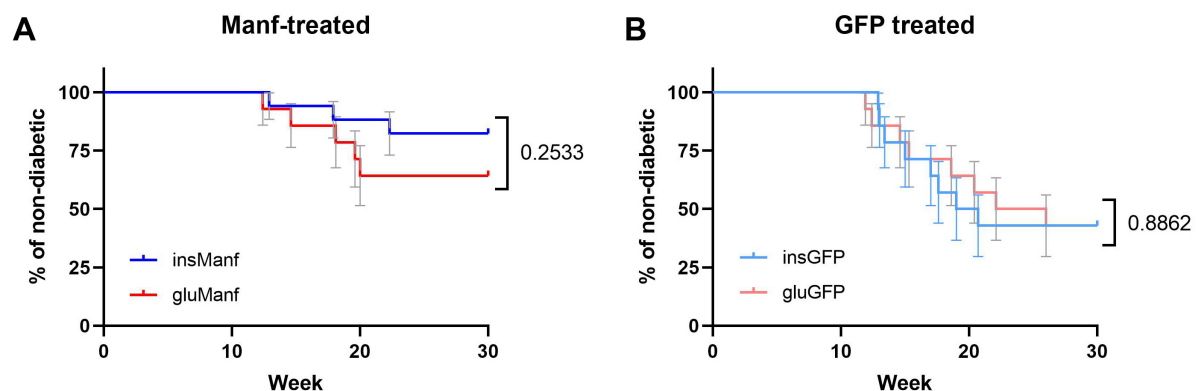

Supplementary Figure S1. Neither the treatment groups, AAV8.*ins*-Manf and AAV8.*glu*-Manf, (P-value of 0.2533) nor AAV8.*ins*-GFP and AAV8.*glu*-GFP (P-value of 0.8862) showed a significant difference.

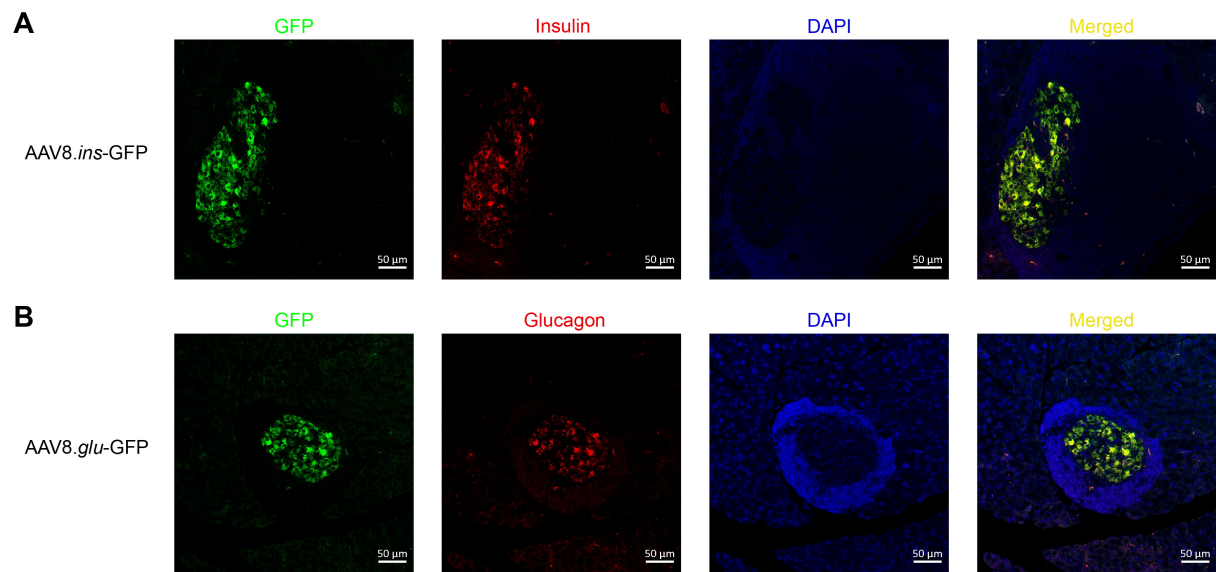

Supplementary Figure S2. Three to four slides of AAV8.*ins*-Manf (n=3), AAV8.*ins*-GFP (n=3), AAV8.*glu*-Manf (n=3) and AAV8.*glu*-GFP (n=3) treated mice were stained with antibodies; anti-GFP (green), insulin (red) or glucagon (red), and DAPI (blue).

*AAV8.ins-Manf*

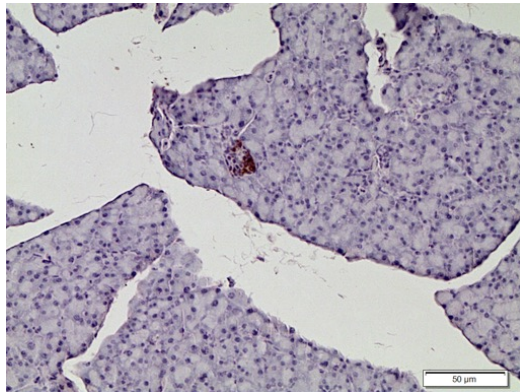

*AAV8.ins-GFP*

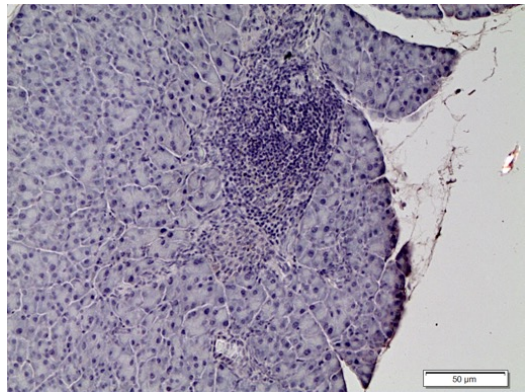

*AAV8.glu-Manf*

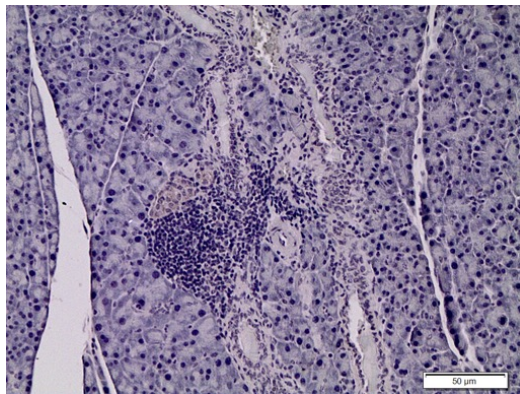

*AAV8.glu-GFP*

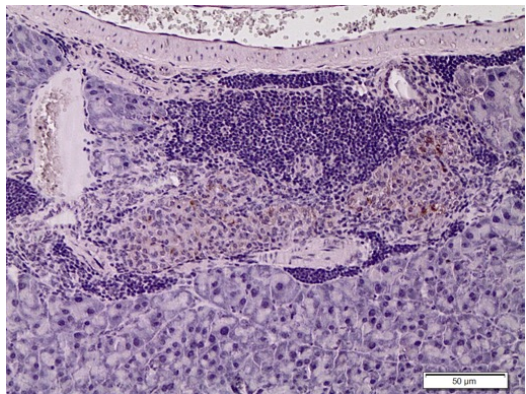

**Supplementary figure S3.** Representative images of pancreatic sections of AAV8.ins-Manf, AAV8.ins-GFP, AAV8.glu-Manf, and AAV8.glu-GFP treated mice. Brown color staining indicates insulin-positive cells.
